# Supplementary material for: Low 2012–13 Influenza Vaccine Effectiveness Associated with Mutation in the Egg-Adapted H3N2 Vaccine Strain Not Antigenic Drift in Circulating Viruses
Source: PLOS journal article supplement (doi:10.1371/journal.pone.0092153), 2014-03-25
Supplement: S7 (10.1371/journal.pone.0092153.s007) [file journal.pone.0092153.s007]

**Table S4. Prior 2011-12 trivalent influenza vaccine (TIV) and/or 2009 monovalent pandemic vaccine<sup>a</sup> effects<sup>b</sup> on 2012-13 TIV effectiveness vs. A(H1N1)pdm09**

| N total = 758; n Cases =67; n Controls=691                                                           | Vaccine effectiveness % (95% CI) |                       |
|------------------------------------------------------------------------------------------------------|----------------------------------|-----------------------|
|                                                                                                      | Crude (unadjusted)               | Adjusted <sup>c</sup> |
| Unvaccinated each specified year (none of 3 vaccines)                                                | [Reference]                      | [Reference]           |
| 2009 monovalent A(H1N1)pdm09 vaccine only                                                            | 55 (2 - 79)                      | 51 (-8 - 78)          |
| (2011-12 <u>OR</u> 2012-13 TIV) but not both, <u>AND NOT</u> 2009 monovalent A(H1N1)pdm09 vaccine    | NE                               | NE                    |
| (2011-12 <u>OR</u> 2012-13 TIV) but not both, <u>AND</u> 2009 monovalent A(H1N1)pdm09 vaccine        | 79 (11 - 95)                     | 79 (9 - 95)           |
| Both 2011-12 <u>AND</u> 2012-13 TIV <u>AND NOT</u> 2009 monovalent A(H1N1)pdm09 vaccine              | 72 (-116 - 96)                   | 76 (-83 - 97)         |
| Both 2011-12 <u>AND</u> 2012-13 TIV <u>AND</u> 2009 monovalent A(H1N1)pdm09 vaccine (all 3 vaccines) | 67 (26 - 86)                     | 63 (12 - 85)          |

- AS03-adjuvanted A(H1N1)pdm09 vaccine was predominantly distributed (>95% of doses) during the 2009 monovalent pandemic influenza immunisation campaign in Canada.
- Children < 4 years of age in 2012-13 were excluded from analysis as they may not have been vaccine-eligible during the fall 2009 immunization campaign on the basis of age <6 months.
- Adjusted for age (4-8, 9-19, 20-49, ≥50 years), comorbidity, interval, week
